# Supplementary material
Source: PubMed Central journal article supplement (PMC7168790)
Supplement: Supplemental_Material1.pdf [file Supplemental_Material1.pdf]

|    |               | 2T4k <sub>v</sub> <sub>b</sub> | BFM      | BFM <sup>60</sup> | SA       | SA <sup>60</sup> | Logan    | Logan <sup>60</sup> |
|----|---------------|--------------------------------|----------|-------------------|----------|------------------|----------|---------------------|
|    |               | VT                             | VT       | VT                | VT       | VT               | VT       | VT                  |
| P1 | Reference     | 0.68521                        | 0.569172 | 0.501216          | 0.714797 | 0.725456         | 0.497541 | 0.429659            |
| P1 | Tumour low    | 0.52866                        | 0.490556 | 0.449174          | 0.67113  | 0.697104         | 0.50138  | 0.450849            |
| P1 | Tumour medium | 0.91522                        | 0.770336 | 0.710348          | 1.041508 | 1.089237         | 0.766201 | 0.697431            |
| P1 | Tumour high   | 1.124                          | 0.961963 | 0.892553          | 1.289153 | 1.33809          | 0.963168 | 0.885802            |
| P2 | Reference     | 0.78524                        | 0.800228 | 0.795008          | 1.032941 | 1.105539         | 0.695318 | 0.619216            |
| P2 | Tumour low    | 0.90254                        | 0.845197 | 0.797107          | 1.034444 | 1.048669         | 0.662464 | 0.529497            |
| P2 | Tumour medium | 0.94782                        | 0.954329 | 0.944471          | 1.211391 | 1.263099         | 0.809188 | 0.702013            |
| P2 | Tumour high   | 0.92343                        | 0.94715  | 0.969304          | 1.259041 | 1.36807          | 0.861452 | 0.793264            |
| P3 | Reference     | 0.84654                        | 0.794342 | 0.775065          | 1.048624 | 1.117658         | 0.75665  | 0.698057            |
| P3 | Tumour low    | 0.84049                        | 0.809526 | 0.779859          | 1.022842 | 1.077832         | 0.77608  | 0.695664            |
| P3 | Tumour medium | 1.0367                         | 1.072991 | 1.013355          | 1.390876 | 1.471459         | 1.001251 | 0.913503            |
| P3 | Tumour high   | 1.3134                         | 1.312287 | 1.273307          | 1.725188 | 1.847029         | 1.225888 | 1.135852            |
| P4 | Reference     | 0.82743                        | 0.808691 | 0.773751          | 1.028357 | 1.082033         | 0.71563  | 0.648647            |
| P4 | Tumour low    | 1.1793                         | 1.104212 | 1.006537          | 1.267481 | 1.273536         | 0.863096 | 0.70383             |
| P4 | Tumour medium | 1.6459                         | 1.630431 | 1.60101           | 2.021556 | 2.138271         | 1.418672 | 1.276157            |
| P4 | Tumour high   | 2.0704                         | 2.113387 | 2.082015          | 2.732582 | 2.979305         | 1.942911 | 1.849897            |
| P5 | Reference     | 1.0586                         | 1.05179  | 1.006263          | 1.195289 | 1.21658          | 0.885707 | 0.75765             |
| P5 | Tumour low    | 1.1772                         | 1.062997 | 1.002645          | 1.179474 | 1.179439         | 0.869895 | 0.707936            |
| P5 | Tumour medium | 1.3656                         | 1.339306 | 1.302874          | 1.538374 | 1.58465          | 1.150198 | 0.995204            |
| P5 | Tumour high   | 2.0487                         | 2.122288 | 2.12151           | 2.435748 | 2.559824         | 1.841881 | 1.688331            |
| P6 | Reference     | 0.8381                         | 0.716677 | 0.702274          | 0.925899 | 0.979576         | 0.667497 | 0.605221            |
| P6 | Tumour low    | 0.87625                        | 0.778227 | 0.74298           | 1.030808 | 1.083678         | 0.803905 | 0.753133            |
| P6 | Tumour medium | 0.96848                        | 0.879568 | 0.845771          | 1.133537 | 1.199681         | 0.918088 | 0.876007            |
| P6 | Tumour high   | 1.0492                         | 0.974348 | 0.943008          | 1.183187 | 1.227365         | 1.01821  | 0.976958            |
| P7 | Reference     | 0.66981                        | 0.648037 | 0.630758          | 0.871578 | 0.933345         | 0.637657 | 0.588255            |
| P7 | Tumour low    | 1.1473                         | 1.039527 | 0.938874          | 1.306035 | 1.322639         | 0.929253 | 0.782953            |
| P7 | Tumour medium | 1.2147                         | 1.125698 | 1.04025           | 1.463656 | 1.524406         | 1.102125 | 1.009767            |
| P7 | Tumour high   | 1.577                          | 1.496294 | 1.391176          | 1.742097 | 1.789628         | 1.439548 | 1.353418            |

| 2T4k <sub>vb</sub> | RLogan   | RLogan <sup>60</sup> | RPM      | RPM <sup>60</sup> | SRTM <sub>2</sub> | SRTM <sub>2</sub> <sup>60</sup> | MRTM <sub>0</sub> |
|--------------------|----------|----------------------|----------|-------------------|-------------------|---------------------------------|-------------------|
| DVR                | DVR      | DVR                  | DVR      | DVR               | DVR               | DVR                             | DVR               |
| #N/A               | 1.003856 | 1.003582             | 0.998896 | 0.997547          | 1.018169          | 1.020202                        | 0.997597          |
| 0.77153            | 1.11612  | 1.144872             | 0.925094 | 0.96673           | 1.005394          | 1.075365                        | 1.054371          |
| 1.335678           | 1.682085 | 1.764342             | 1.317818 | 1.334495          | 1.530836          | 1.631524                        | 1.592257          |
| 1.640373           | 2.13137  | 2.271355             | 1.554353 | 1.502403          | 1.927811          | 2.071952                        | 2.031284          |
| #N/A               | 1.001976 | 1.009391             | 1.009357 | 1.000759          | 1.037508          | 1.040879                        | 0.993946          |
| 1.149381           | 0.975264 | 0.949539             | 1.095592 | 1.076901          | 1.0641            | 1.043629                        | 0.97188           |
| 1.207045           | 1.162696 | 1.145914             | 1.218104 | 1.20129           | 1.222519          | 1.240157                        | 1.159926          |
| 1.175984           | 1.261559 | 1.287436             | 1.19088  | 1.175681          | 1.265369          | 1.333018                        | 1.244253          |
| #N/A               | 1.002699 | 1.001795             | 0.992653 | 0.975971          | 1.038696          | 1.067407                        | 0.996863          |
| 0.992853           | 1.025652 | 1.027394             | 1.03728  | 1.03267           | 1.075258          | 1.083586                        | 1.010335          |
| 1.224632           | 1.293699 | 1.286825             | 1.311767 | 1.267792          | 1.373687          | 1.362529                        | 1.279465          |
| 1.551492           | 1.563508 | 1.54623              | 1.569464 | 1.543209          | 1.664888          | 1.686001                        | 1.551411          |
| #N/A               | 1.000695 | 0.999129             | 1.015272 | 1.009386          | 1.018581          | 1.01737                         | 0.997277          |
| 1.425257           | 1.195351 | 1.138911             | 1.34145  | 1.300669          | 1.324804          | 1.259801                        | 1.18002           |
| 1.989171           | 1.917055 | 1.906722             | 1.933474 | 1.981763          | 2.027808          | 2.05857                         | 1.904985          |
| 2.502206           | 2.709613 | 2.762777             | 2.416572 | 2.617229          | 2.729064          | 2.899079                        | 2.67383           |
| #N/A               | 1.001468 | 0.992317             | 1.004681 | 1.011628          | 1.030181          | 1.057155                        | 0.998106          |
| 1.112035           | 0.97867  | 0.964814             | 1.008743 | 1.01068           | 1.016075          | 1.034063                        | 0.973968          |
| 1.290006           | 1.270549 | 1.273817             | 1.282765 | 1.297708          | 1.311747          | 1.343087                        | 1.257474          |
| 1.935292           | 1.98709  | 2.008024             | 1.980775 | 2.041634          | 2.040687          | 2.114903                        | 1.971778          |
| #N/A               | 1.000598 | 0.997549             | 1.008504 | 1.01138           | 1.011639          | 1.020821                        | 0.998765          |
| 1.04552            | 1.31284  | 1.353017             | 1.159409 | 1.091117          | 1.225243          | 1.254728                        | 1.269766          |
| 1.155566           | 1.536074 | 1.62804              | 1.28838  | 1.177747          | 1.414759          | 1.470012                        | 1.448775          |
| 1.251879           | 1.720653 | 1.861121             | 1.407046 | 1.258646          | 1.59608           | 1.674039                        | 1.580316          |
| #N/A               | 1.002184 | 1.009304             | 0.992675 | 0.986031          | 1.029336          | 1.06689                         | 0.997883          |
| 1.712874           | 1.419778 | 1.376197             | 1.522402 | 1.422742          | 1.525574          | 1.440812                        | 1.398879          |
| 1.813499           | 1.765408 | 1.810602             | 1.74042  | 1.698977          | 1.717703          | 1.707091                        | 1.740585          |
| 2.354399           | 2.378711 | 2.507302             | 2.263853 | 2.288288          | 2.228618          | 2.300827                        | 2.306471          |

| MRTM <sub>0</sub> <sup>60</sup> | MRTM     | MRTM <sup>60</sup> | MRTM <sub>2</sub> | MRTM <sub>2</sub> <sup>60</sup> | MRTM <sub>3</sub> | MRTM <sub>3</sub> <sup>60</sup> | MRTM <sub>4</sub> | MRTM <sub>4</sub> <sup>60</sup> |
|---------------------------------|----------|--------------------|-------------------|---------------------------------|-------------------|---------------------------------|-------------------|---------------------------------|
| DVR                             | DVR      | DVR                | DVR               | DVR                             | DVR               | DVR                             | DVR               | DVR                             |
| 0.989417                        | 1.030947 | 1.011585           | 1.068069          | 1.367969                        | 0.987059          | 0.969146                        | 0.98332           | 10.78118                        |
| 1.089527                        | 0.986124 | 1.136145           | 4.078293          | 0.809416                        | 1.058457          | 1.074676                        | 1.549257          | 10.62353                        |
| 1.644978                        | 1.549255 | 1.781682           | 5.812955          | 1.212556                        | 1.591892          | 1.630366                        | 2.208518          | 10.88157                        |
| 2.08725                         | 1.692751 | 2.135578           | 7.883965          | 1.339025                        | 2.011306          | 2.070707                        | 2.859443          | 10.63937                        |
| 0.979969                        | 1.030465 | 1.003049           | 0.25407           | 1.148673                        | 0.976839          | 0.873366                        | 0.811565          | 1.526438                        |
| 0.924835                        | 0.999289 | 0.949421           | 0.463785          | 0.959205                        | 0.965531          | 0.783396                        | 0.769975          | 1.447325                        |
| 1.134334                        | 1.18676  | 1.139108           | 0.634986          | 1.405371                        | 1.143256          | 1.041765                        | 0.950212          | 1.79087                         |
| 1.237741                        | 1.264393 | 1.380693           | 0.382981          | 2.015363                        | 1.218657          | 1.129444                        | 1.043838          | 2.016749                        |
| 0.974444                        | 1.015909 | 0.995925           | 1.363094          | 1.240702                        | 0.995596          | 0.992192                        | 0.923218          | 10.81553                        |
| 1.028305                        | 1.067168 | 1.020276           | 1.830735          | 1.464092                        | 1.023494          | 1.03224                         | 0.939234          | 10.48519                        |
| 1.284017                        | 1.362303 | 1.29224            | 2.16498           | 1.636436                        | 1.296522          | 1.291132                        | 1.232946          | 11.60694                        |
| 1.546694                        | 1.626742 | 1.618157           | 2.480392          | 2.069221                        | 1.566944          | 1.561654                        | 1.485422          | 11.36265                        |
| 0.977015                        | 1.024463 | 0.993914           | 1.400139          | 1.269203                        | 0.966473          | 0.97625                         | 0.698791          | 9.143122                        |
| 1.118617                        | 1.231872 | 1.092522           | 0.999033          | 1.189552                        | 1.202119          | 1.079862                        | 0.782396          | 11.68672                        |
| 1.904204                        | 2.027123 | 1.905741           | 2.353785          | 1.967548                        | 1.896715          | 1.94282                         | 1.42332           | 10.43984                        |
| 2.744654                        | 2.816388 | 2.902667           | 4.968183          | 4.504963                        | 2.615804          | 2.733985                        | 2.144462          | 12.2846                         |
| 1.004391                        | 1.04384  | 1.04755            | 1.386529          | 1.181365                        | 0.974694          | 0.934358                        | 0.880542          | 6.411837                        |
| 0.963848                        | 0.981417 | 0.960754           | 1.088877          | 1.103928                        | 0.95761           | 0.929999                        | 0.850354          | 6.368746                        |
| 1.25091                         | 1.327032 | 1.270244           | 1.981409          | 1.413971                        | 1.241678          | 1.224596                        | 1.124182          | 8.029384                        |
| 1.981077                        | 2.101694 | 2.070894           | 3.218146          | 2.065832                        | 1.941             | 1.955166                        | 1.816332          | 9.233798                        |
| 0.994513                        | 1.0017   | 1.017864           | 1.031459          | 1.058814                        | 0.991295          | 0.992663                        | 0.923095          | 10.26432                        |
| 1.316263                        | 1.220235 | 1.250369           | 1.118614          | 1.165285                        | 1.274925          | 1.32873                         | 1.170739          | 9.484012                        |
| 1.539461                        | 1.34695  | 1.456108           | 1.244559          | 1.324361                        | 1.47789           | 1.554274                        | 1.343998          | 9.051622                        |
| 1.722455                        | 1.460802 | 1.508521           | 1.363657          | 1.464396                        | 1.64951           | 1.746405                        | 1.493561          | 8.984947                        |
| 0.986469                        | 1.033333 | 1.044787           | 1.051407          | 0.925258                        | 0.997673          | 0.939737                        | 0.979612          | -2.41571                        |
| 1.31738                         | 1.478334 | 1.309243           | 1.979277          | 0.871843                        | 1.453797          | 1.279855                        | 1.477389          | -3.44439                        |
| 1.783124                        | 1.728365 | 1.76931            | 1.724245          | 0.914865                        | 1.752891          | 1.694142                        | 1.768174          | -4.80469                        |
| 2.458123                        | 2.244988 | 2.266064           | 2.03524           | -0.62192                        | 2.331576          | 2.204401                        | 2.289796          | -6.28816                        |

| SUVr <sup>20-40</sup> | SUVr <sup>40-60</sup> | SUVr <sup>60-90</sup> |
|-----------------------|-----------------------|-----------------------|
| SUVr                  | SUVr                  | SUVr                  |
| 0.999884              | 0.999946              | 0.999941              |
| 1.211136              | 1.105005              | 1.006236              |
| 1.870029              | 1.660745              | 1.523796              |
| 2.421495              | 2.102776              | 1.901215              |
| 0.999941              | 0.999954              | 0.999956              |
| 0.892453              | 0.962502              | 0.999851              |
| 1.135756              | 1.14871               | 1.179016              |
| 1.354468              | 1.244694              | 1.243509              |
| 0.999953              | 0.999959              | 0.999957              |
| 0.974317              | 1.014196              | 1.01553               |
| 1.231442              | 1.275246              | 1.296674              |
| 1.493946              | 1.542727              | 1.566711              |
| 0.999928              | 0.999938              | 0.999943              |
| 1.073027              | 1.170832              | 1.216693              |
| 1.843261              | 1.920649              | 1.900966              |
| 2.867647              | 2.743887              | 2.614763              |
| 0.999922              | 0.999934              | 0.999942              |
| 0.933465              | 0.965359              | 0.981752              |
| 1.267097              | 1.264107              | 1.253796              |
| 2.018575              | 1.992111              | 1.936509              |
| 0.999933              | 0.999953              | 0.999956              |
| 1.419623              | 1.307571              | 1.213269              |
| 1.740638              | 1.509727              | 1.369077              |
| 1.998408              | 1.645665              | 1.494959              |
| 0.99993               | 0.999937              | 0.999943              |
| 1.29418               | 1.369564              | 1.456327              |
| 1.805212              | 1.748056              | 1.73652               |
| 2.590996              | 2.342735              | 2.237181              |
