# Supplementary material
Source: PubMed Central journal article supplement (PMC7168790)
Supplement: Supplemental_Material2.pdf [file Supplemental_Material2.pdf]

### Supplemental data table one

Title:

Patient information

Legend:

Clinical information of included patients.

### Supplemental data table two

Title:

Regional values

Legend:

Average value for each region and all methods.

### Supplemental data table three

Title:

Noise values

Legend:

Measured coefficients of variance as estimate of noise for each method.
